# Supplementary material
Source: HighWire-hosted journal article supplement (https://jitc.bmj.com/content/11/1/e006024)
Supplement: inline-supplementary-material-1 [file inline-supplementary-material-1.pdf]

| Cell line  | JX-594  | SJ-607  |
|------------|---------|---------|
| A549       | 0.00287 | 0.00162 |
| MDA-MB-231 | 0.04784 | 0.04282 |
| HCT-116    | 0.07800 | 0.03120 |
| AGS        | 0.00835 | 0.00430 |
| SK-MEL-2   | 0.01201 | 0.00781 |
| SNU-1214   | 0.01313 | 0.01256 |
| NCI-H1975  | 0.01533 | 0.01933 |
| SW620      | 0.28050 | 0.12556 |
| SNU-333    | 0.19787 | 0.09392 |
| SNU-475    | 0.02437 | 0.02901 |

**Supplementary Table 1. Mean EC<sub>50</sub> values of JX-594 or SJ-607 in 10 cancer cell lines.** The *in vitro* cytotoxicities of JX-594 and SJ-607 were examined in various human cancer cell lines, and cell viabilities were measured by CCK-8 assays at 72 h post-infection. The experiments were repeated four times in triplicate and mean EC<sub>50</sub> values were calculated. Unit = pfu/cell.

| Group  |       | Individual luminescence Intensity (Radiance (p/sec/cm <sup>2</sup> /sr) |          |          |          |          |
|--------|-------|-------------------------------------------------------------------------|----------|----------|----------|----------|
|        |       | Time After Administration (hr)                                          |          |          |          |          |
|        |       | 24                                                                      | 56       | 96       | 120      | 144      |
| SJ-610 | Left  | 2.32E+08                                                                | 2.06E+08 | 1.79E+09 | 3.77E+09 | 1.42E+09 |
|        | Right | 1.63E+08                                                                | 1.74E+08 | 3.40E+09 | 4.08E+09 | 1.33E+09 |
| SJ-607 | Left  | 5.33E+08                                                                | 6.20E+08 | 2.01E+09 | 4.25E+09 | 1.60E+09 |
|        | Right | 9.02E+08                                                                | 1.18E+09 | 2.85E+09 | 9.18E+09 | 2.76E+09 |

**Supplementary Table 2. Luminescence intensity in the tumor site of mice intravenously injected with SJ-607.** A single dose of 1 x 10<sup>6</sup> pfu was intravenously injected into the NSG mice subcutaneously implanted with HCT-116 cells and the presence of virus was analyzed by measuring luciferase activity. Individual data points at 96 h post-injection are shown.

|        | Mouse No. | Section No. | Tumor area( $\mu\text{m}^2$ ) | GFP area( $\mu\text{m}^2$ ) | % GFP area /Tumor area |
|--------|-----------|-------------|-------------------------------|-----------------------------|------------------------|
| SJ-610 | 1         | 2           | 16,452,180.61                 | 992,652.06                  | 6.03                   |
|        | 1         | 3           | 15,687,019.45                 | 767,859.82                  | 4.89                   |
|        | 1         | 11          | 33,383,911.32                 | 1,410,090.42                | 4.22                   |
|        | 1         | 13          | 35,718,508.20                 | 1,507,781.28                | 4.22                   |
|        | 2         | 3           | 24,410,610.31                 | 2,370,651.28                | 9.71                   |
|        | 2         | 11          | 32,112,434.21                 | 1,939,754.61                | 6.04                   |
|        | 3         | 5           | 21,746,725.91                 | 1,547,694.78                | 7.12                   |
|        | 3         | 7           | 24,378,942.94                 | 1,768,839.55                | 7.26                   |
|        | 3         | 10          | 31,390,968.56                 | 632,211.03                  | 2.01                   |
|        | 4         | 2           | 22,269,320.11                 | 1,308,257.70                | 5.87                   |
|        | 4         | 11          | 32,060,113.67                 | 1,771,717.98                | 5.53                   |
| SJ-607 | 1         | 10          | 18,049,776.93                 | 915,022.33                  | 5.07                   |
|        | 1         | 16          | 20,965,619.64                 | 1,434,666.94                | 6.84                   |
|        | 2         | 1           | 34,561,557.38                 | 4,139,688.58                | 11.98                  |
|        | 2         | 4           | 40,790,557.22                 | 4,694,720.32                | 11.51                  |
|        | 2         | 5           | 42,220,602.59                 | 7,708,019.68                | 18.26                  |
|        | 2         | 7           | 46,894,141.87                 | 6,615,545.40                | 14.11                  |
|        | 3         | 3           | 17,527,836.81                 | 1,720,488.51                | 9.82                   |
|        | 3         | 10          | 36,133,201.03                 | 4,310,427.86                | 11.93                  |
|        | 4         | 4           | 27,889,087.75                 | 1,451,047.63                | 5.20                   |
|        | 4         | 12          | 35,751,789.20                 | 2,024,217.87                | 5.66                   |
|        | 5         | 3           | 27,390,404.62                 | 2,838,736.83                | 10.36                  |
|        | 5         | 9           | 38,359,280.23                 | 4,063,904.56                | 10.59                  |

**Supplementary Table 3. Mean area density of viruses in tumors of mice intravenously injected with SJ-607.** A single dose of  $1 \times 10^6$  pfu was intravenously injected into the NSG mice subcutaneously implanted with A549 cells. The distributions of viral particles in tumor tissue at 120 h post-injection were analyzed by immunofluorescence. Individual data points are shown.

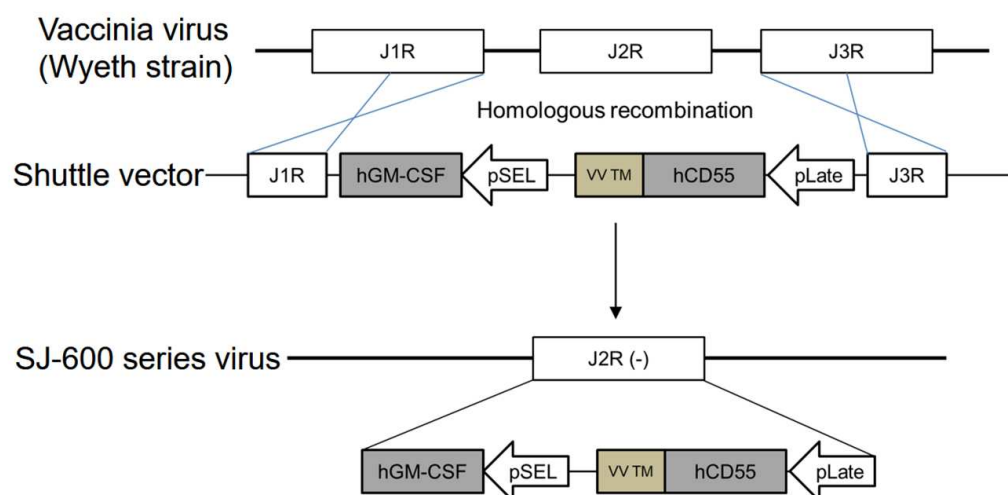

**Supplementary Figure 1. Schematic structure of CD55-expressing recombinant vaccinia virus SJ-600 series.** CD55-expressing recombinant virus was constructed by insertion of the *CD55* gene fused with the vaccinia virus membrane protein transmembrane domain and *GM-CSF* gene into the *J2R* locus of the Wyeth strain of vaccinia virus through homologous recombination. The *GM-CSF* gene was driven by a synthetic early/late promoter, and the *CD55* gene was driven by a late promoter.

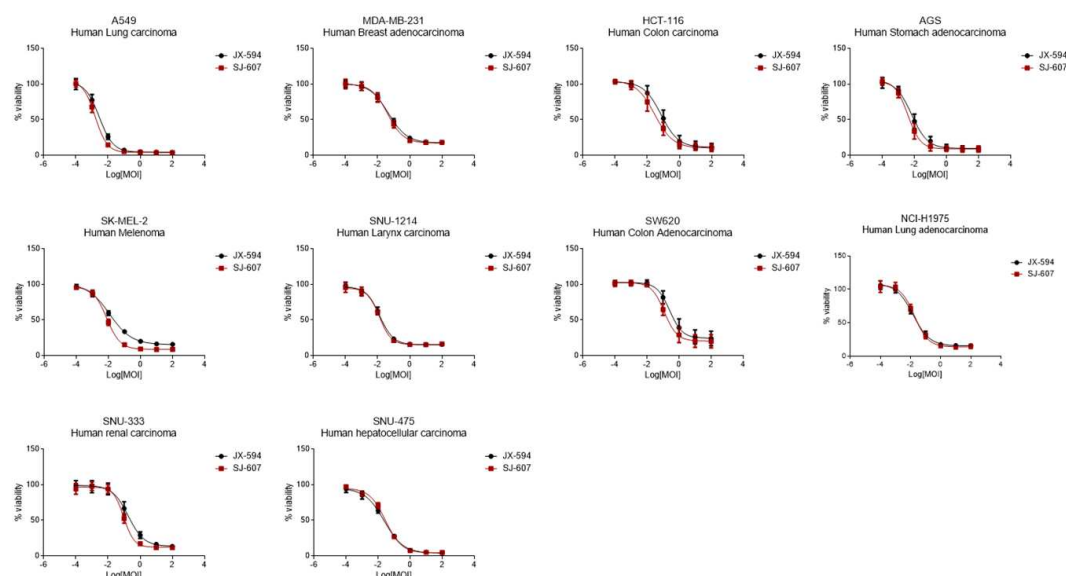

**Supplementary Figure 2. *In vitro* cytotoxicity of the SJ-607 recombinant vaccinia virus expressing CD55.** Viabilities of 10 human cancer cell lines after inoculation with serially diluted JX-594 or SJ-607 at a MOI of 100 to 0.0001. Cell viabilities were determined by CCK-8 assays at 72 h post-infection. Experiments were conducted four times in triplicate by two independent operators. Graphs show the means  $\pm$  standard deviations of four experiments, with uninfected mock control regarded as 100% viability.

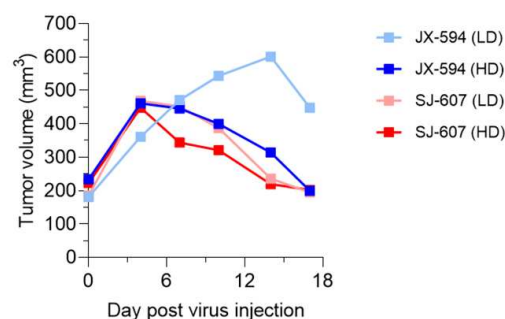

**Supplementary Figure 3. Antitumor efficacies of intravenously injected SJ-607 in large tumors.** A549 human lung cancer cells were subcutaneously implanted into NSG mice and a single dose of recombinant vaccinia virus (high dose,  $5 \times 10^6$  pfu; low dose,  $1 \times 10^6$  pfu) was intravenously injected through the tail vein when tumor size was  $\sim 200 \text{ mm}^3$ . Tumor size was monitored twice weekly.

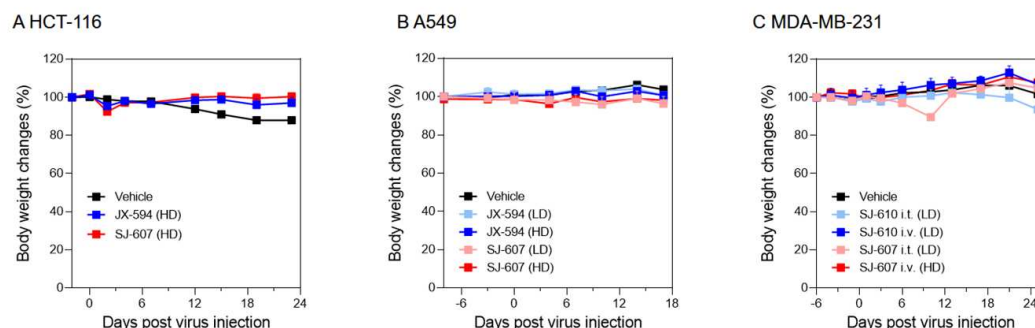

**Supplementary Figure 4. Body weight changes in tumor-bearing mice systemically administered SJ-607.** Tumor cells were subcutaneously implanted into NSG mice and a single dose of recombinant vaccinia virus (high dose,  $5 \times 10^6$  pfu; low dose,  $1 \times 10^6$  pfu) was intravenously injected through the tail vein when tumor size was approximately 80–120 mm<sup>3</sup>. (A) Body weight changes in HCT-116 human colon cancer model (high-dose groups only), (B) in A549 human lung cancer model, and (C) in MDA-MB-231 human triple-negative breast cancer model (low-dose groups only).
